# Supplementary material
Source: Springer Nature journal article supplement (https://www.springermedizin.de/resource/supplementary/12885_2014_5198_MOESM12_ESM.pdf/9468570)
Supplement: MOESM12 [file 9468570]

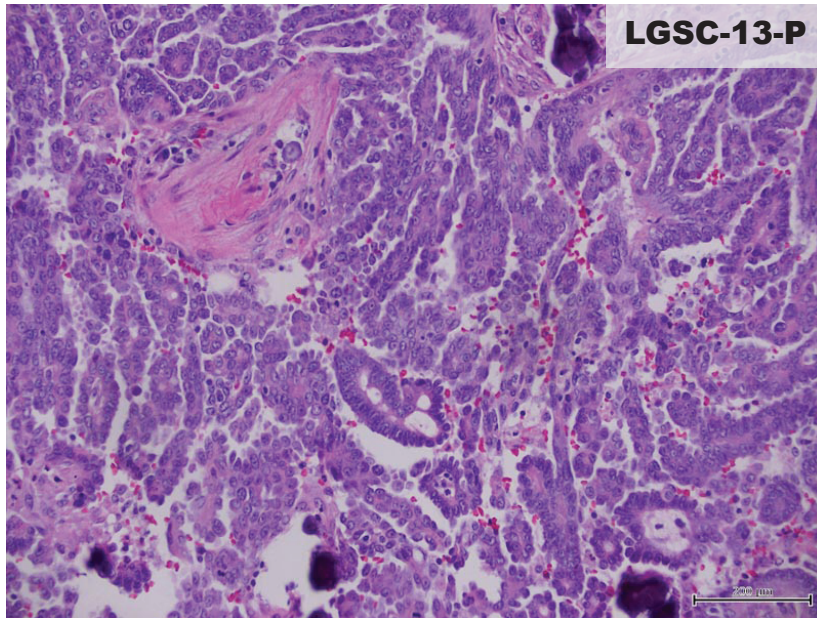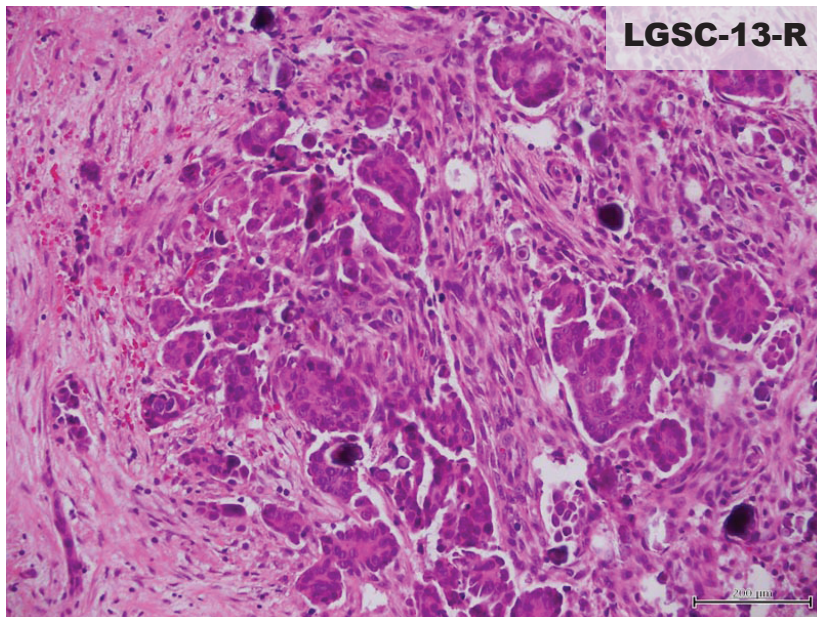

**Additional File 14. LGSC-13 Case Images.**
